# Supplementary material for: Performance limit of one-dimensional SbSI nanowire transistors
Source: Royal Society of Chemistry journal article supplement (doi:10.1039/d3tc00517h), 2023-01-01
Supplement: d3tc00517h1.pdf [file d3tc00517h1.pdf]

# The Supplemental Material for “Performance Limit of One Dimension SbSI Nanowires Transistors”

Xingyi Tan<sup>1</sup>, Qiang Li<sup>2</sup>, Dahua Ren<sup>2</sup>

<sup>1</sup>*Department of Physics, Chongqing Three Gorges University, Wanzhou, 404100, China*

<sup>2</sup>*College of Intelligent systems science and engineering, Hubei Minzu University, Enshi, 445000, China*

## Content

Section 1. Fig. S1. Band structure of SbSI nanowire.

Section 2. Fig. S2. The Current-Voltage attributes of SbSI FETs with different doping type and doping concentration. The value for bias voltage was 0.64 V.

Section 3. Table S1. The doping concentration and the maximum currents.

Section 4. Table S2. Criteria of the sub-5 nm Lg GAA SbSI FETs' ballistic efficiency versus the 2028 requirements of the ITRS 2013 for the HP and LP applications. The n-doped.

Section 5. Table S3. Criteria of the sub-5 nm Lg GAA SbSI FETs' ballistic efficiency versus the 2028 requirements of the ITRS 2013 for the HP and LP applications. The p-doped.

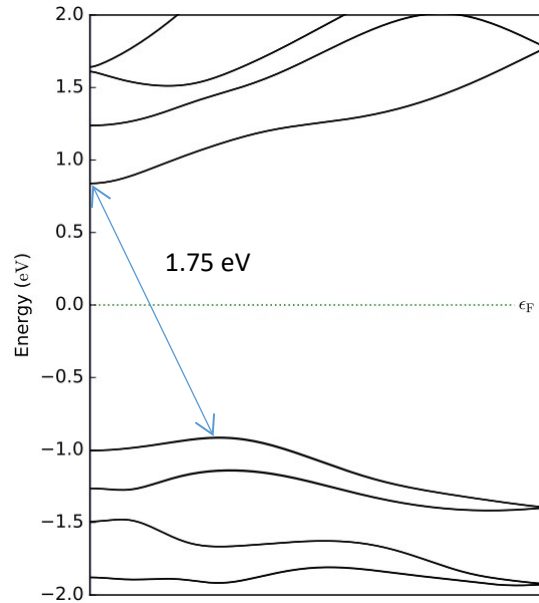

Fig. S1. Band structure of SbSI nanowire.

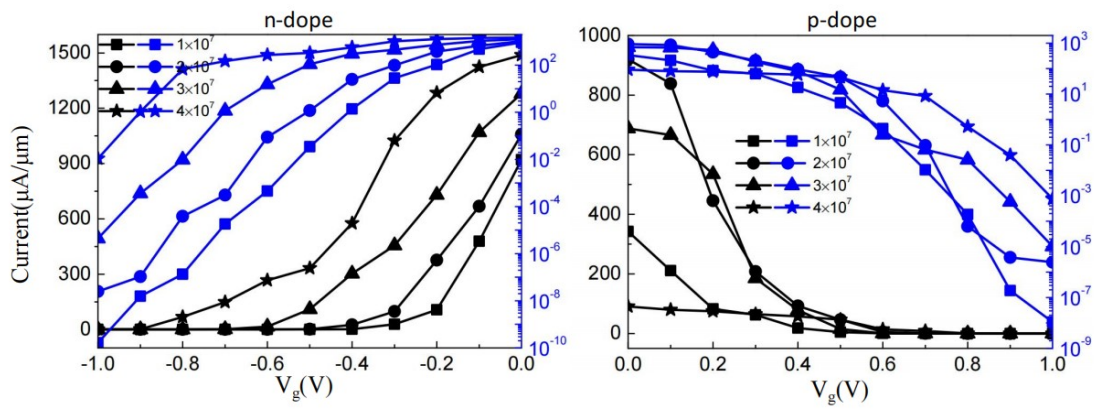

Fig. S2. The Current-Voltage attributes of SbSI FETs with different doping type and doping concentration. The value for bias voltage was 0.64 V.

**Table s1.** The doping concentration and the maximum currents

| Doping type | Doping concentration (/m) | Maximum currents ( $\mu\text{A}/\mu\text{m}$ ) | SS (mV/dec) |
|-------------|---------------------------|------------------------------------------------|-------------|
| P-type      | $1 \times 10^7$           | 342.31                                         | 79.2        |
|             | $2 \times 10^7$           | 919.93                                         | 58.7        |
|             | $3 \times 10^7$           | 687.94                                         | 107.3       |
|             | $4 \times 10^7$           | 90.83                                          | 207.0       |
| N-type      | $1 \times 10^7$           | 921.10                                         | 57.8        |
|             | $2 \times 10^7$           | 1058.20                                        | 65.7        |
|             | $3 \times 10^7$           | 1280.33                                        | 91.3        |
|             | $4 \times 10^7$           | 1488.33                                        | 454.0       |

**Table s2.** Criteria of the sub-5 nm Lg GAA SbSI FETs' ballistic efficiency versus the 2028 requirements of the ITRS 2013 for the HP and LP applications. The n-doped.

|                | $L_g$<br>(nm) | UL<br>(nm) | SS<br>(mV/dec) | $I_{off}$<br>( $\mu A/\mu m$ ) | $I_{on}$<br>( $\mu A/\mu m$ ) | $I_{on}/I_{off}$   | $C_t$<br>(fF/ $\mu m$ ) | $\tau$ (ps) | PDP<br>(fJ/ $\mu m$ ) |
|----------------|---------------|------------|----------------|--------------------------------|-------------------------------|--------------------|-------------------------|-------------|-----------------------|
| <b>HP</b>      | 5             | 0          | 100.9          | 0.1                            | 5791.28                       | $5.79 \times 10^4$ | 0.302                   | 0.100       | 0.371                 |
|                |               | 1          | 73.6           | 0.1                            | 5684.99                       | $5.68 \times 10^4$ | 0.278                   | 0.094       | 0.342                 |
|                |               | 2          | 62.3           | 0.1                            | 3296.23                       | $3.30 \times 10^4$ | 0.167                   | 0.097       | 0.205                 |
|                |               | 3          | 57.8           | 0.1                            | 1643.82                       | $1.64 \times 10^4$ | 0.073                   | 0.085       | 0.089                 |
|                | 3             | 0          | 239.0          | 0.1                            | -                             | -                  | -                       | -           | -                     |
|                |               | 1          | 116.2          | 0.1                            | 4114.83                       | $4.11 \times 10^4$ | 0.158                   | 0.074       | 0.194                 |
|                |               | 2          | 80.3           | 0.1                            | 2611.78                       | $2.61 \times 10^4$ | 0.089                   | 0.065       | 0.109                 |
|                |               | 3          | 70.9           | 0.1                            | 1489.41                       | $1.49 \times 10^4$ | 0.051                   | 0.066       | 0.063                 |
|                | 1             | 1          | 286.3          | 0.1                            | -                             | -                  | -                       | -           | -                     |
|                |               | 2          | 154.0          | 0.1                            | 536.07                        | $5.36 \times 10^3$ | 0.027                   | 0.095       | 0.033                 |
|                |               | 3          | 105.9          | 0.1                            | 975.44                        | $9.75 \times 10^3$ | 0.018                   | 0.036       | 0.023                 |
|                | <b>LP</b>     | 5          | 0              | 100.9                          | $5 \times 10^{-5}$            | -                  | -                       | -           | -                     |
| 1              |               |            | 73.6           | $5 \times 10^{-5}$             | 1449.66                       | $2.90 \times 10^7$ | 0.113                   | 0.149       | 0.138                 |
| 2              |               |            | 62.3           | $5 \times 10^{-5}$             | 1233.98                       | $2.47 \times 10^7$ | 0.081                   | 0.126       | 0.099                 |
| 3              |               |            | 57.8           | $5 \times 10^{-5}$             | 758.92                        | $1.52 \times 10^7$ | 0.048                   | 0.121       | 0.059                 |
| 3              |               | 0          | 239.0          | $5 \times 10^{-5}$             | -                             | -                  | -                       | -           | -                     |
|                |               | 1          | 116.2          | $5 \times 10^{-5}$             | -                             | -                  | -                       | -           | -                     |
|                |               | 2          | 80.3           | $5 \times 10^{-5}$             | 118.86                        | $2.38 \times 10^6$ | 0.024                   | 0.385       | 0.029                 |
|                |               | 3          | 70.9           | $5 \times 10^{-5}$             | 489.63                        | $9.79 \times 10^6$ | 0.023                   | 0.092       | 0.029                 |
| 1              |               | 1          | 286.3          | $5 \times 10^{-5}$             | -                             | -                  | -                       | -           | -                     |
|                |               | 2          | 154.0          | $5 \times 10^{-5}$             | -                             | -                  | -                       | -           | -                     |
|                |               | 3          | 105.9          | $5 \times 10^{-5}$             | -                             | -                  | -                       | -           | -                     |
| <b>ITRS</b>    |               |            |                |                                |                               |                    |                         |             |                       |
| <b>HP</b>      | 5.1           | -          | -              | 0.1                            | 900                           | $9.00 \times 10^3$ | 0.60                    | 0.423       | 0.24                  |
| <b>2028</b>    |               |            |                |                                |                               |                    |                         |             |                       |
| <b>ITRS</b>    |               |            |                |                                |                               |                    |                         |             |                       |
| <b>LP 2028</b> | 5.9           | -          | -              | $5 \times 10^{-5}$             | 295                           | $5.90 \times 10^6$ | 0.69                    | 1.493       | 0.28                  |

$L_g$ : the gate length. UL: the underlap length. SS: the subthreshold swing.  $I_{off}$ : the off-state current.  $I_{on}$ : the on-state current.  $C_g$ : the gate capacitance.  $\tau$ : the delay time. PDP: the power dissipation.

**Table s3.** Criteria of the sub-5 nm Lg GAA SbSI FETs' ballistic efficiency versus the 2028 requirements of the ITRS 2013 for the HP and LP applications. The p-doped.

|                | $L_g$<br>(nm) | UL<br>(nm) | SS<br>(mV/dec) | $I_{off}$<br>( $\mu A/\mu m$ ) | $I_{on}$<br>( $\mu A/\mu m$ ) | $I_{on}/I_{off}$   | $C_t$<br>(fF/ $\mu m$ ) | $\tau$ (ps) | PDP<br>(fJ/ $\mu m$ ) |
|----------------|---------------|------------|----------------|--------------------------------|-------------------------------|--------------------|-------------------------|-------------|-----------------------|
| <b>HP</b>      | 5             | 0          | 125.0          | 0.1                            | 2885.42                       | $2.89 \times 10^4$ | 0.417                   | 0.277       | 0.512                 |
|                |               | 1          | 71.1           | 0.1                            | 2588.87                       | $2.59 \times 10^4$ | 0.338                   | 0.251       | 0.416                 |
|                |               | 2          | 64.4           | 0.1                            | 1618.59                       | $1.62 \times 10^4$ | 0.267                   | 0.317       | 0.328                 |
|                |               | 3          | 58.7           | 0.1                            | 873.82                        | $8.74 \times 10^3$ | 0.168                   | 0.369       | 0.206                 |
|                | 3             | 0          | 224.0          | 0.1                            | -                             | -                  | -                       | -           | -                     |
|                |               | 1          | 135.3          | 0.1                            | 2071.91                       | $2.07 \times 10^4$ | 0.212                   | 0.197       | 0.261                 |
|                |               | 2          | 86.1           | 0.1                            | 1240.91                       | $1.24 \times 10^4$ | 0.118                   | 0.183       | 0.145                 |
|                |               | 3          | 80.8           | 0.1                            | 731.39                        | $7.31 \times 10^3$ | 0.088                   | 0.231       | 0.108                 |
|                | 1             | 1          | 382.8          | 0.1                            | -                             | -                  | -                       | -           | -                     |
|                |               | 2          | 208.1          | 0.1                            | 418.73                        | $4.19 \times 10^3$ | 0.028                   | 0.128       | 0.034                 |
|                |               | 3          | 177.7          | 0.1                            | 479.49                        | $4.79 \times 10^3$ | 0.024                   | 0.097       | 0.030                 |
|                | <b>LP</b>     | 5          | 0              | 125.0                          | $5 \times 10^{-5}$            | -                  | -                       | -           | -                     |
| 1              |               |            | 71.1           | $5 \times 10^{-5}$             | 977.97                        | $1.96 \times 10^7$ | 0.312                   | 0.613       | 0.384                 |
| 2              |               |            | 64.4           | $5 \times 10^{-5}$             | 1090.39                       | $2.18 \times 10^7$ | 0.223                   | 0.392       | 0.274                 |
| 3              |               |            | 58.7           | $5 \times 10^{-5}$             | 672.02                        | $1.34 \times 10^7$ | 0.117                   | 0.335       | 0.144                 |
| 3              |               | 0          | 224.0          | $5 \times 10^{-5}$             | -                             | -                  | -                       | -           | -                     |
|                |               | 1          | 135.3          | $5 \times 10^{-5}$             | -                             | -                  | -                       | -           | -                     |
|                |               | 2          | 86.1           | $5 \times 10^{-5}$             | -                             | -                  | -                       | -           | -                     |
|                |               | 3          | 80.8           | $5 \times 10^{-5}$             | 306.56                        | $6.13 \times 10^6$ | 0.045                   | 0.284       | 0.056                 |
| 1              |               | 1          | 382.8          | $5 \times 10^{-5}$             | -                             | -                  | -                       | -           | -                     |
|                |               | 2          | 208.1          | $5 \times 10^{-5}$             | -                             | -                  | -                       | -           | -                     |
|                |               | 3          | 177.7          | $5 \times 10^{-5}$             | -                             | -                  | -                       | -           | -                     |
| <b>ITRS</b>    |               |            |                |                                |                               |                    |                         |             |                       |
| <b>HP</b>      | 5.1           | -          | -              | 0.1                            | 900                           | $9.00 \times 10^3$ | 0.6                     | 0.423       | 0.24                  |
| <b>2028</b>    |               |            |                |                                |                               |                    |                         |             |                       |
| <b>ITRS</b>    |               |            |                |                                |                               |                    |                         |             |                       |
| <b>LP 2028</b> | 5.9           | -          | -              | $5 \times 10^{-5}$             | 295                           | $5.90 \times 10^6$ | 0.69                    | 1.493       | 0.28                  |

$L_g$ : the gate length. UL: the underlap length. SS: the subthreshold swing.  $I_{off}$ : the off-state current.  $I_{on}$ : the on-state current.  $C_g$ : the gate capacitance.  $\tau$ : the delay time. PDP: the power dissipation.
